# Supplementary material for: Thiophene-based mesoporous covalent organic framework for efficient iodine vapor capture
Source: Royal Society of Chemistry journal article supplement (doi:10.1039/d4nj02750g), 2024-01-01
Supplement: d4nj02750g1.pdf [file d4nj02750g1.pdf]

## Supporting Information

# Thiophene-based Mesoporous Covalent Organic Framework for Efficient Iodine Vapor Capture

Chuanxue You<sup>a,b</sup>, Yuxin Yao<sup>a,b</sup>, Shengnan Qi<sup>a,c</sup>, Tianyu Zhou<sup>a,d</sup>, Xin Ren<sup>\*a,c</sup>, Yunchao Ma<sup>\*a,b</sup> and  
Chunbo Liu<sup>\*a,d</sup>

<sup>a</sup> Key Laboratory of Preparation and Application of Environmental Friendly Materials, Ministry of Education, Jilin Normal University, Changchun 130103, P.R. China.

<sup>b</sup> College of chemistry, Jilin Normal University, Siping 136000, P.R. China.

<sup>c</sup> College of Engineering, Jilin Normal University, Siping 136000, P.R. China.

<sup>d</sup> Jilin Joint Technology Innovation Laboratory of Developing and Utilizing Materials of Reducing Pollution and Carbon Emissions, College of Engineering, Jilin Normal University, Siping, 136000, China

## Section S1. Experimental

### S1.1 Measurements

**PXRD** patterns were collected on a Empyrean DY01610 Advance diffractometer operated at 40 kV and 35 mA using Cu K $\alpha$  radiation and in the range of 2-40°, the structure of COFs was simulated by Material Studio Software. **Fourier transform infrared (FT-IR)** spectra in the range of 4000 to 500 cm<sup>-1</sup> were collected by Universal ATR accessory. **N<sub>2</sub> adsorption and desorption** of COFs were performed at 77 K using ASAP 2460, Micromeritics Instrument Corp, USA. Pore size distributions and pore volumes were derived from the adsorption isotherms. **X-ray photoelectron spectroscopy (XPS)** spectra were obtained by the Kratos axis supra™ of Shimadzu. **Solid state <sup>13</sup>C NMR (NMR)** spectra of all the samples were collected on a Bruker Avance III instrument with AS500 magnet equipped with a cryoprobe (300 MHz). **Scanning electron microscopy (SEM)** measurements was performed on a JEOL 8100 scanning electron microscope at an acceleration voltage of 10 kV. **Thermogravimetric analysis (TGA)** was carried out on the DTG-60AH from 30 to 800 °C under N<sub>2</sub> with a heating rate of 10 °C min<sup>-1</sup>. **The ultraviolet–visible diffuse reflectance spectroscopy (UV–vis DRS)** was conducted on Shimadzu UV-2600 tested from 220 to 800 nm.

### S1.2 Materials

All starting materials and solvents were obtained from commercial sources and used without further purification.

4',4''',4''''-(1,3,5-Triazine-2,4,6-triyl)tris((1,1'-biphenyl)-4-amine) (TTPB,97%), Thieno [3,2-b]thiophene-2,5-dicarboxaldehyde (TTDC, 97%), and [1,1':4',1'':3'',1''':4''',1''''-Quinquephenyl]-4,4''''-diamine, 5''-(4'-amino[1,1'-biphenyl]-4-yl)-(QDAB, 95%) were purchased from Shanghai Haohong Scientific Co., Ltd. N, N–dimethylformamide (DMF, 99.99%), tetrahydrofuran (THF, 99.99%), acetic acid (99%), 1,4-dioxane (99.8%), dichloromethane (98%), n-butanol(99%), methanol, acetone, iodine, bromatum kalium (KBr, 99%) were purchased from J&K Scientific or Sinopharm. The solvents mentioned above are anhydrous solvents.

### **S1.3 The adsorption experimental of I<sub>2</sub> vapor**

The JLNU-COFs were activated with anhydrous methanol and acetone exchange solvents for 3 times and calcined at 80 °C for 4 h under nitrogen atmosphere to ensure the removal of water molecules from them. Then, an open vial (2 mL) containing the COF sample (20.0 mg) was placed in a large vial (10 mL) containing iodine (1 g), and the large vial was sealed and stored in a constant temperature oven at 75 °C. After a period of time, the vial containing the COF sample was weighed and placed back into the vial containing iodine. The vial was sealed and placed back into the oven at 75°C to continue adsorption until the mass of the vial containing the adsorbent remained constant. The iodine uptake capacity of JLNU-COFs was calculated according to equation (1).

$$a=(m_2-m_1)/m_1 \quad (1)$$

$a$  (g g<sup>-1</sup>) is the iodine adsorption capacity,  $m_1$  (g) and  $m_2$  (g) are the mass of the sample before and after iodine capture.

### **S1.4 Iodine release and recycling**

JLNU-COFs absorbing iodine (4 mg) were immersed in ethanol (40 mL) and kept for a certain time. Then the absorbance of the supernatant at different time intervals was determined by UV-Vis spectrophotometer.

The I<sub>2</sub>@JLNU-COFs were added to 50 mL of ethanol in a vial under a constant temperature water bath at 25°C, and the ethanol was changed every 2 h until the solution was colourless. The COFs samples were filtered, ethanol washed, and dried under vacuum at 100°C for 6 h, and then repeated in the next cycle.

## Section S2. Supplemental figures and tables

### S2.1 PXRD patterns

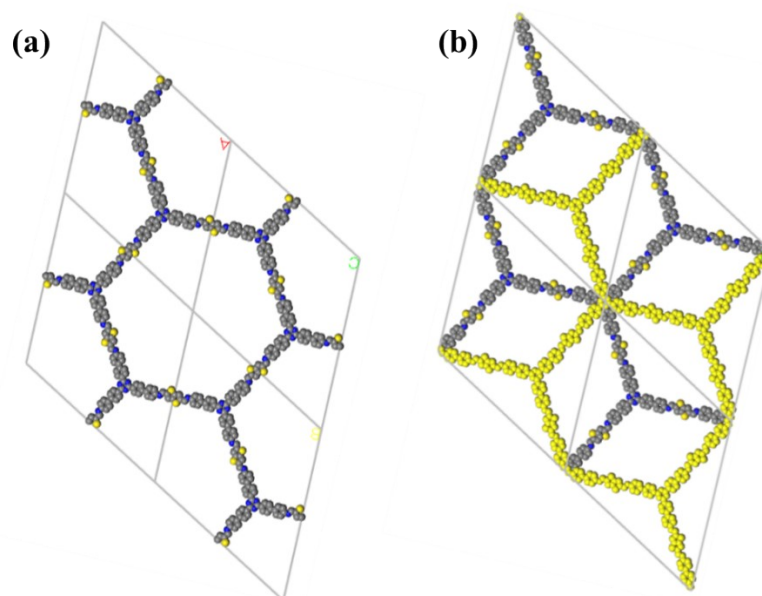

**Fig. S1.** Vertical projection view (up) of the structure for (a) AA stacking and (b) AB stacking of JLNU-312.

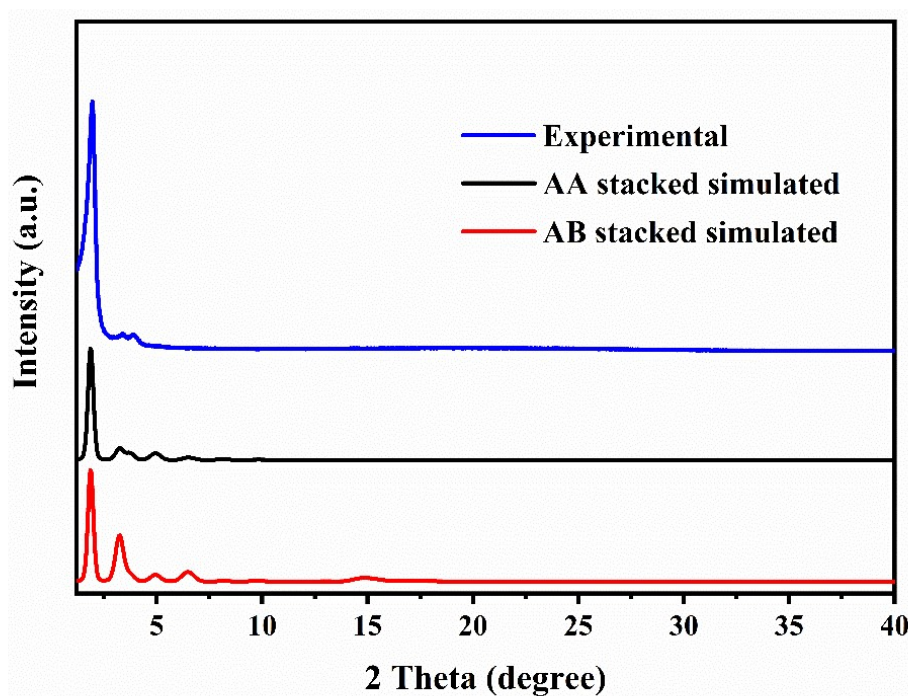

**Fig. S2.** Comparison of PXRD patterns for JLNU-312: calculated based on the AA stacked (black), AB stacked (red), and experiment (blue).

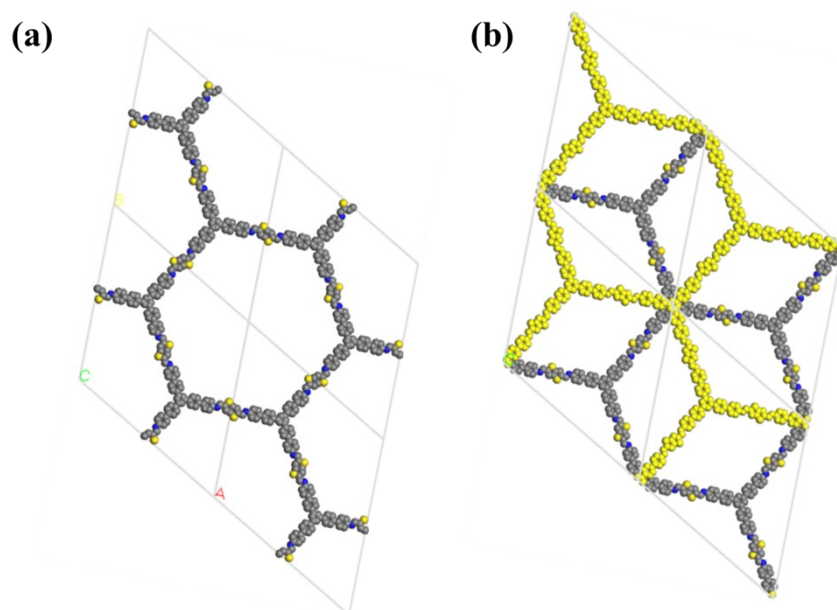

**Fig. S3.** Vertical projection view (up) of the structure for (a) AA stacking and (b) AB stacking of JLNU-313.

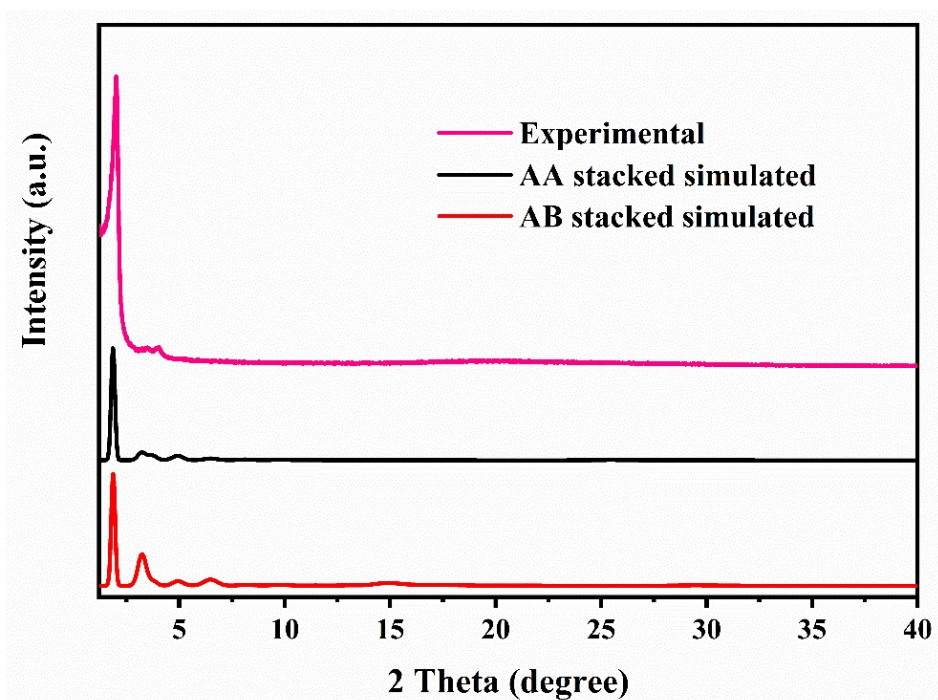

**Fig. S4.** Comparison of PXRD patterns for JLNU-313: calculated based on the AA stacked (black), AB stacked (red), and experiment (pink).

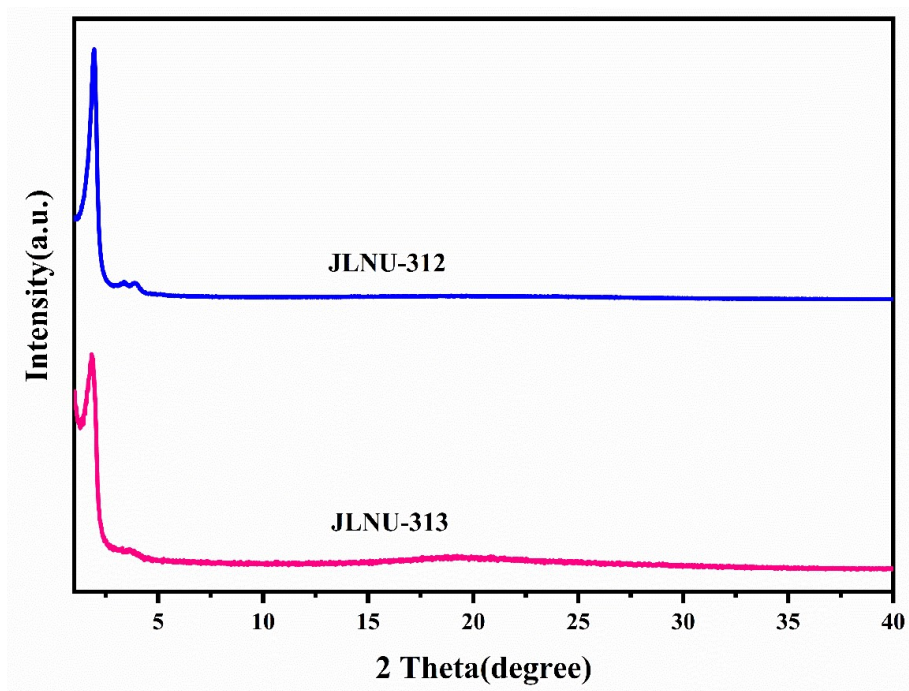

**Fig. S5.** Comparison of PXRD patterns for JLNU-312 (blue) and JLNU-313 (pink).

## S2.2 $^{13}\text{C}$ NMR

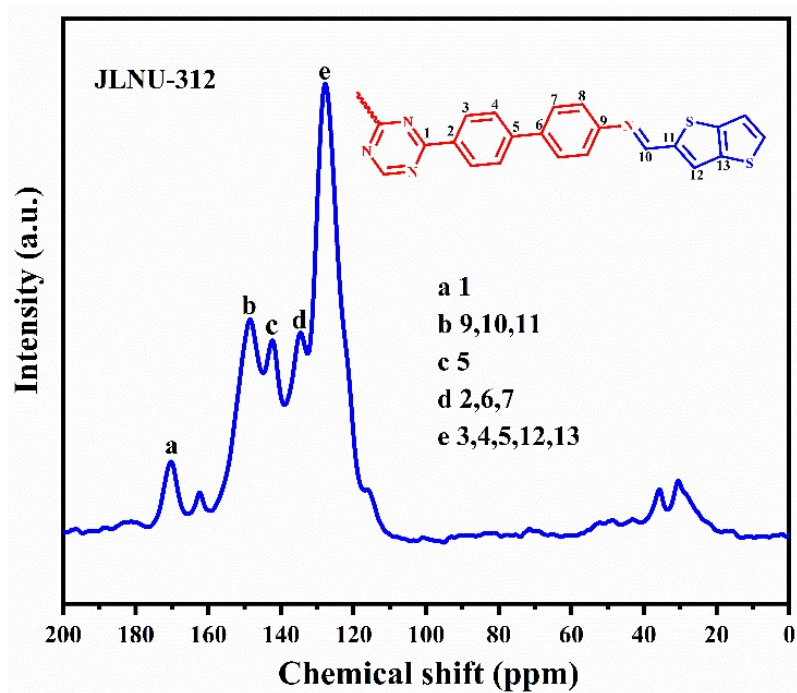

**Fig. S6.** Solid-state  $^{13}\text{C}$  NMR spectrum of JLNU-312.

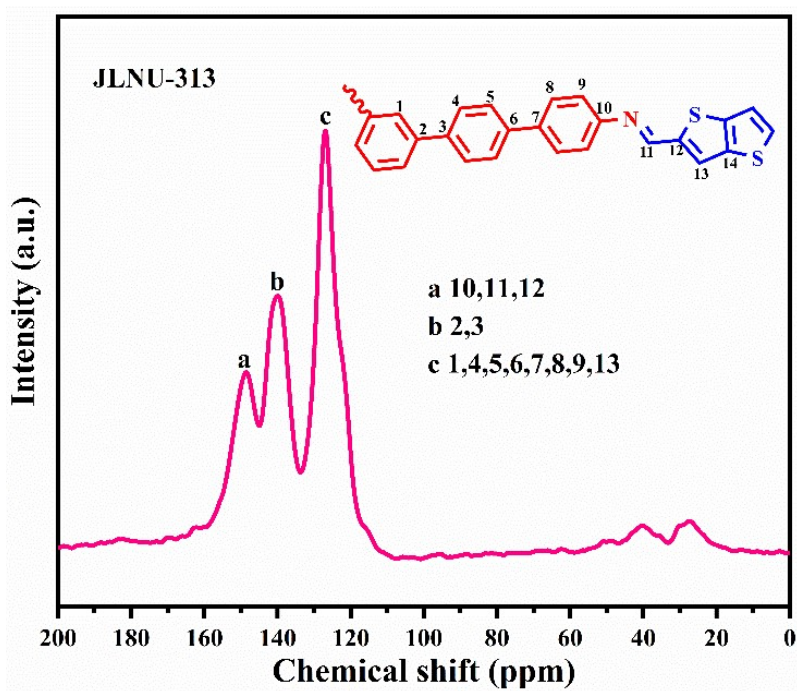

**Fig. S7.** Solid-state  $^{13}\text{C}$  NMR spectrum of JLNU-313.

## S2.3 Gas adsorption isotherms

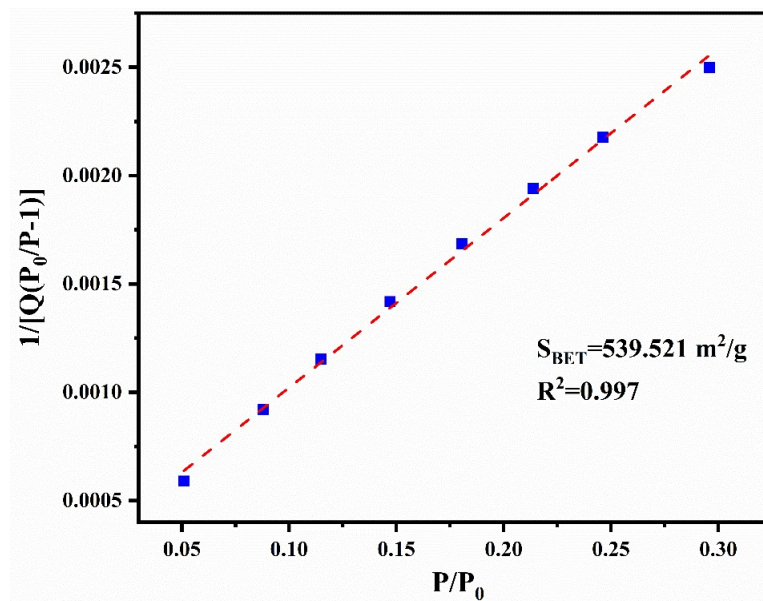

**Fig. S8.** BET plot of JLNU-312 calculated from  $\text{N}_2$  adsorption isotherm at 77 K. (Before the test, the material was soaked in acetone for 8 h and then activated by vacuum heating (100 °C) for 8 h.)

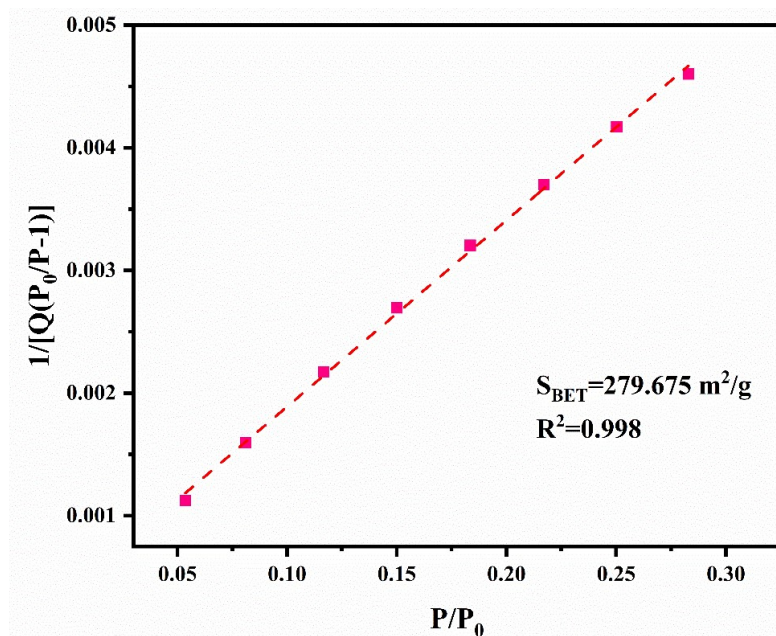

**Fig. S9.** BET plot of JLNU-313 calculated from  $\text{N}_2$  adsorption isotherm at 77 K. (Before the test, the material was soaked in acetone for 8 h and then activated by vacuum heating (100 °C) for 8 h.)



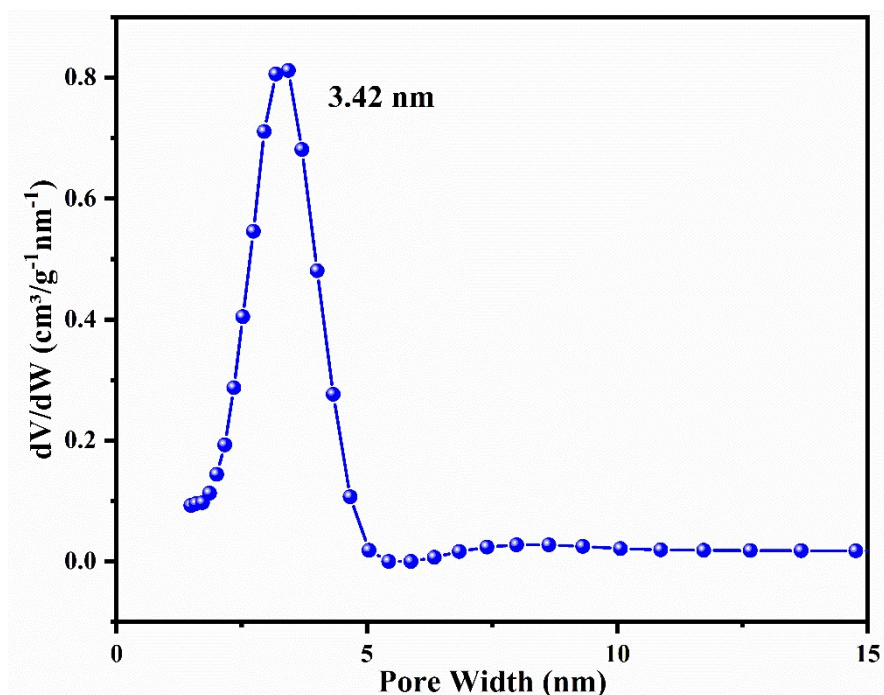

**Fig. S10.** The pore size distribution of JLNU-312. (Before the test, the material was soaked in acetone for 8 h and then activated by vacuum heating (100 °C) for 8 h.)

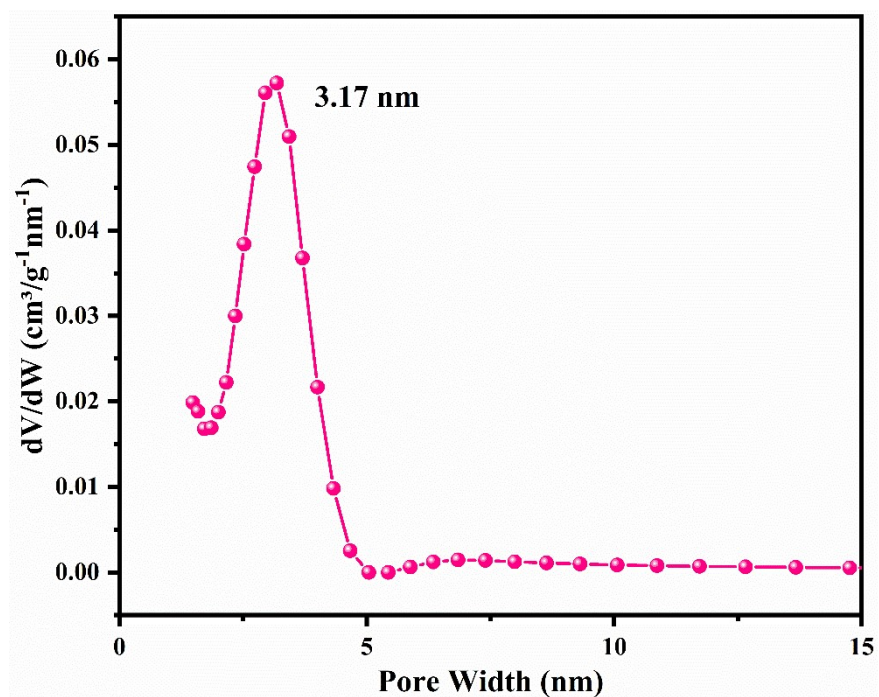

**Fig. S11.** The pore size distribution of JLNU-313. (Before the test, the material was soaked in acetone for 8 h, and then activated by vacuum heating (100 °C) for 8 h.)

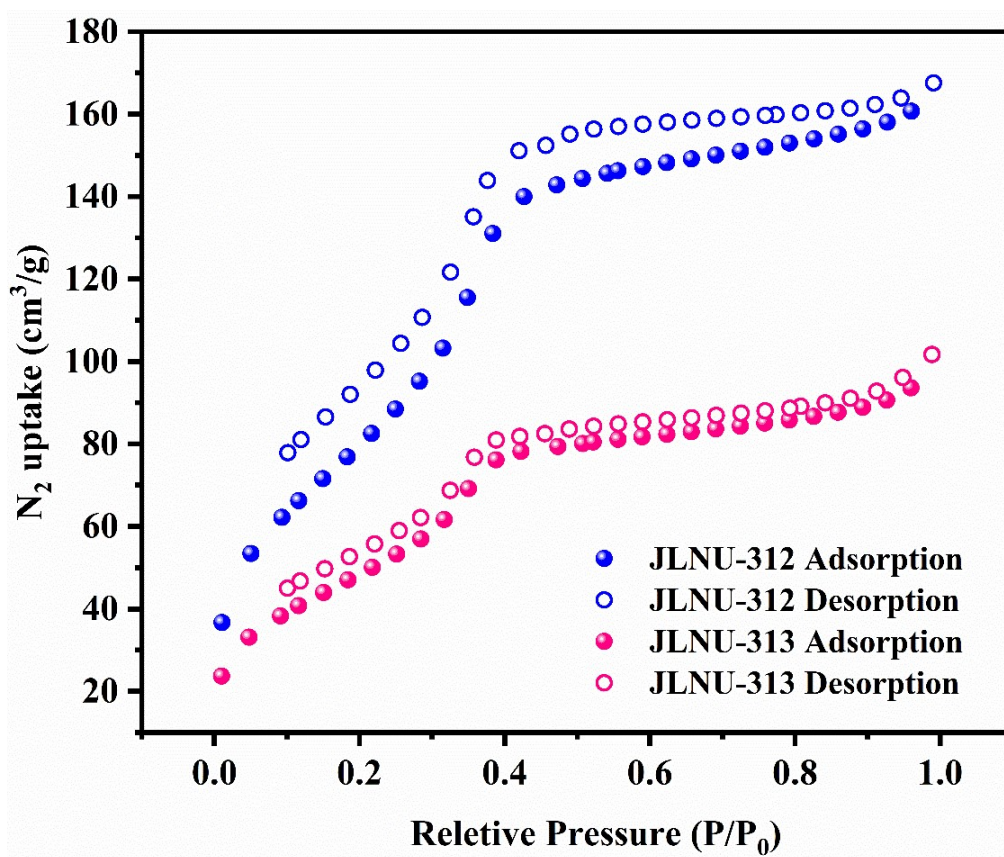

**Fig. S12.** N<sub>2</sub> adsorption-desorption isotherm of JLNU-312 (blue) and JLNU-313 (pink). (Before the test, the material was soaked in acetone for 8 h and then activated by heating (100 °C) under N<sub>2</sub> flow for 8 h.)

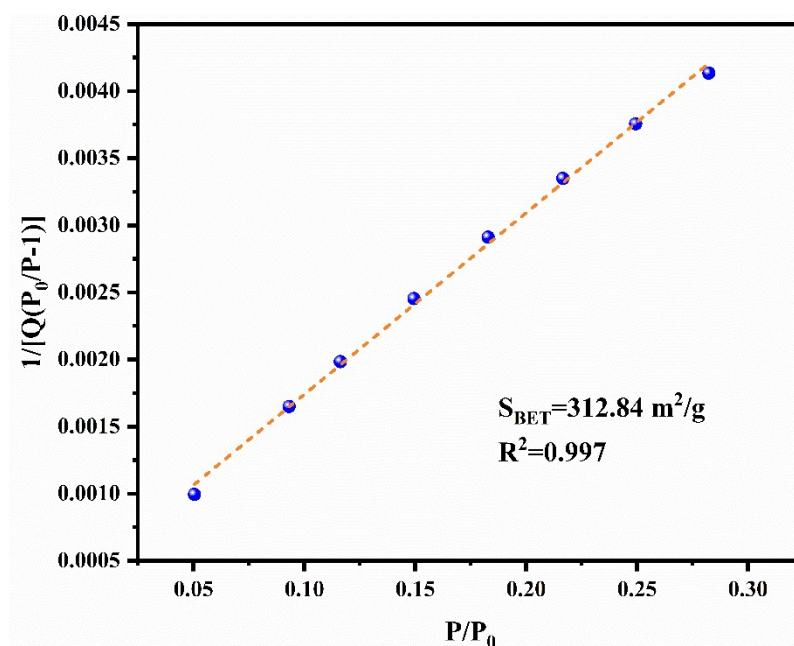

**Fig. S13.** BET plot of JLNU-312 calculated from N<sub>2</sub> adsorption isotherm at 77 K. (Before the test, the material was soaked in acetone for 8 h and then activated by heating (100 °C) under N<sub>2</sub> flow for 8 h.)

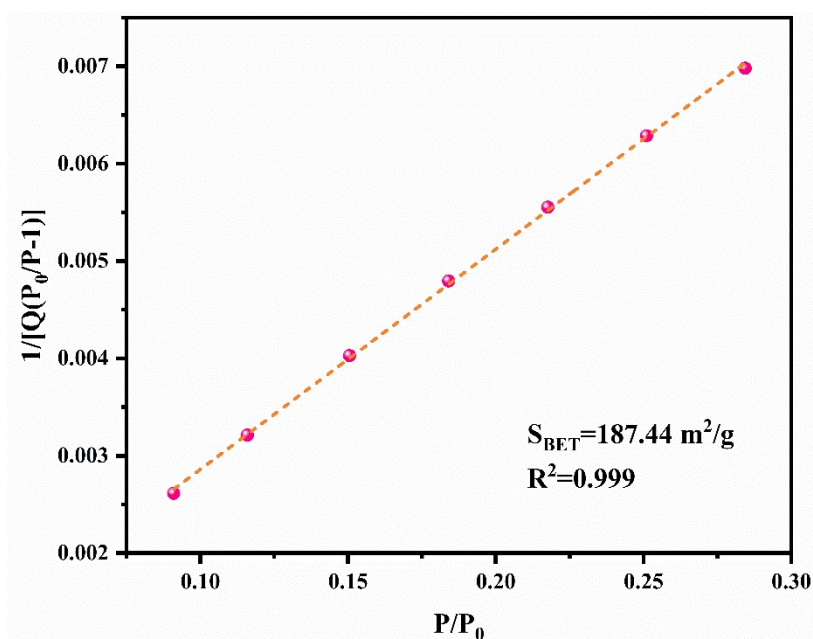

**Fig. S14.** BET plot of JLNU-313 calculated from N<sub>2</sub> adsorption isotherm at 77 K. (Before the test, the material was soaked in acetone for 8 h and then activated by heating (100 °C) under N<sub>2</sub> flow for 8 h.)

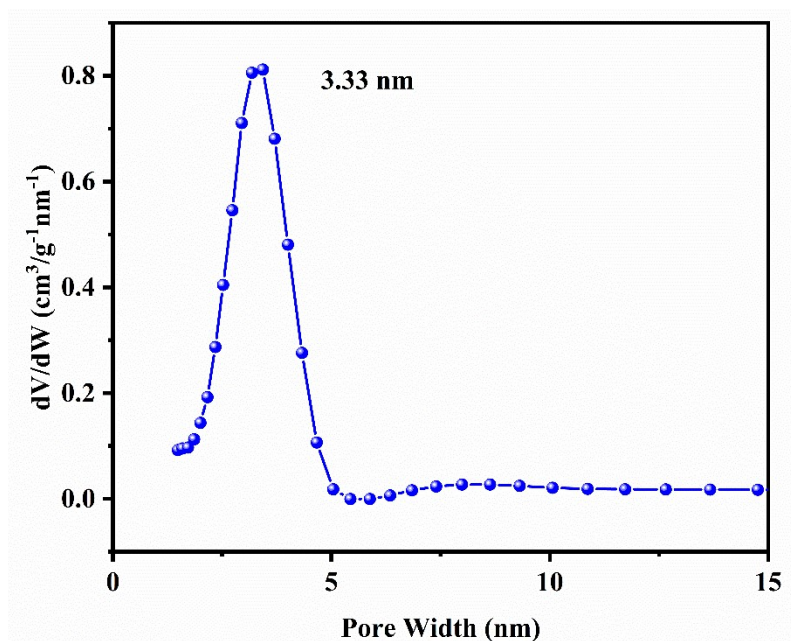

**Fig. S15.** The pore size distribution of JLNU-312. (Before the test, the material was soaked in acetone for 8 h and then activated by heating (100 °C) under N<sub>2</sub> flow for 8 h.)

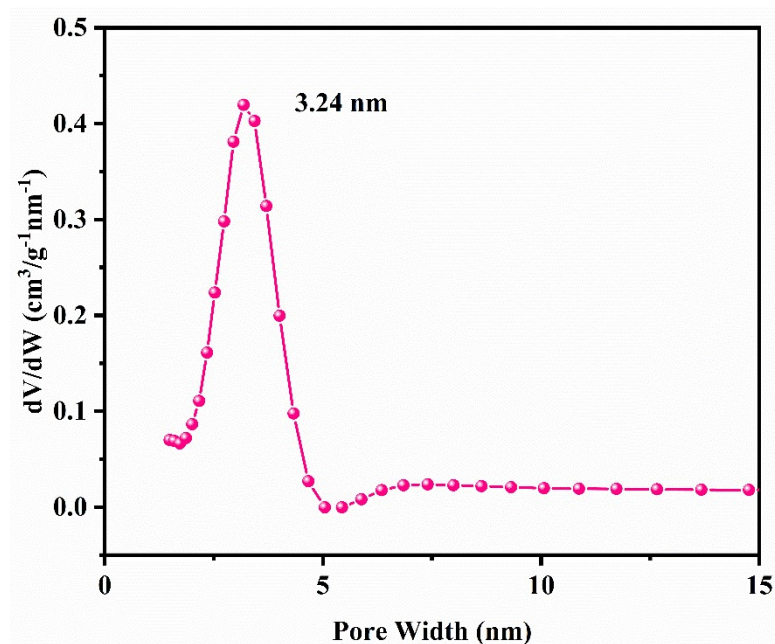

**Fig. S16.** The pore size distribution of JLNU-313. (Before the test, the material was soaked in acetone solvent for 8 h and then activated by heating (100 °C) under N<sub>2</sub> flow for 8 h.)

## S2.4 TGA

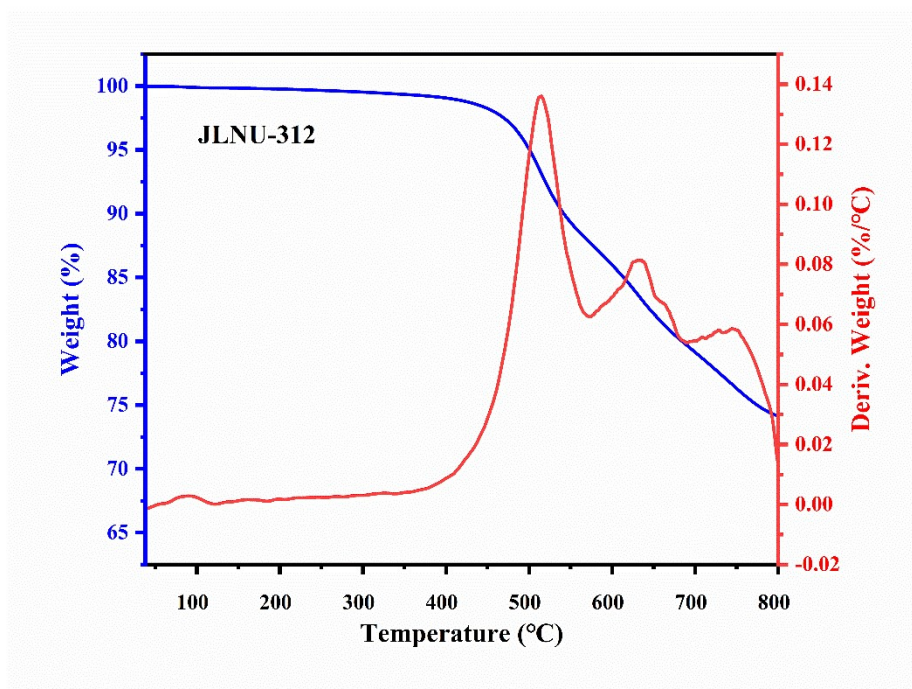

**Fig. S17.** TGA (blue) and DTG (red) curves of JLNU-312 under N<sub>2</sub>.

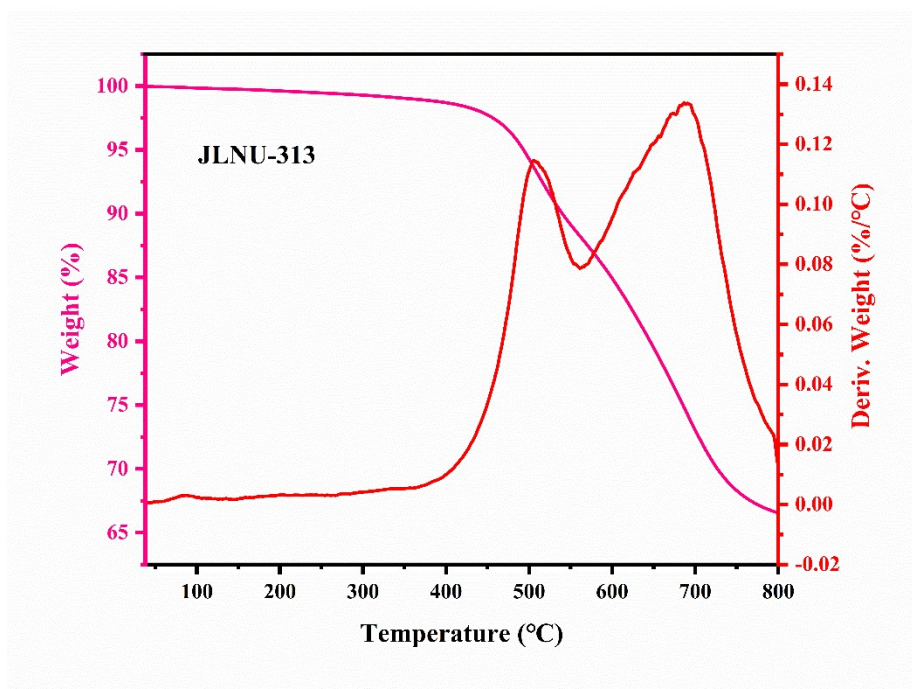

**Fig. S18.** TGA (pink) and DTG (red) curves of JLNU-313 under N<sub>2</sub>.

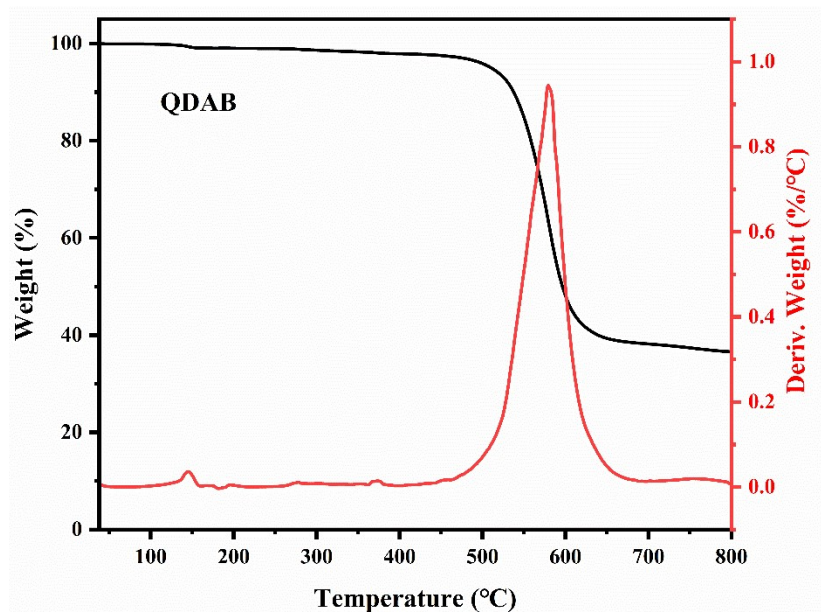

**Fig. S19.** TGA (black) and DTG (red) curves of QDAB under N<sub>2</sub>.

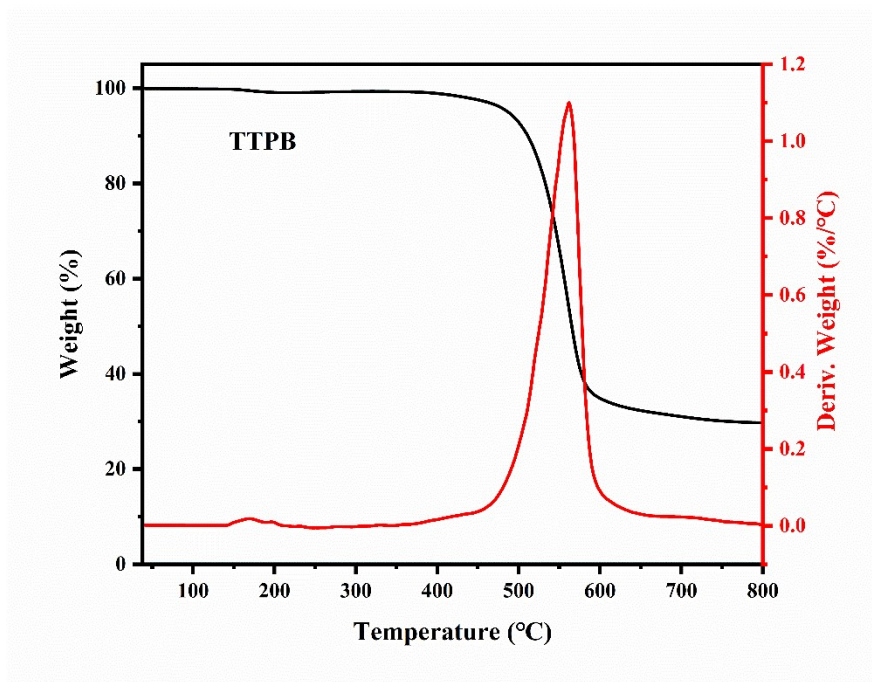

**Fig. S20.** TGA (black) and DTG (red) curves of TTPB under N<sub>2</sub>.

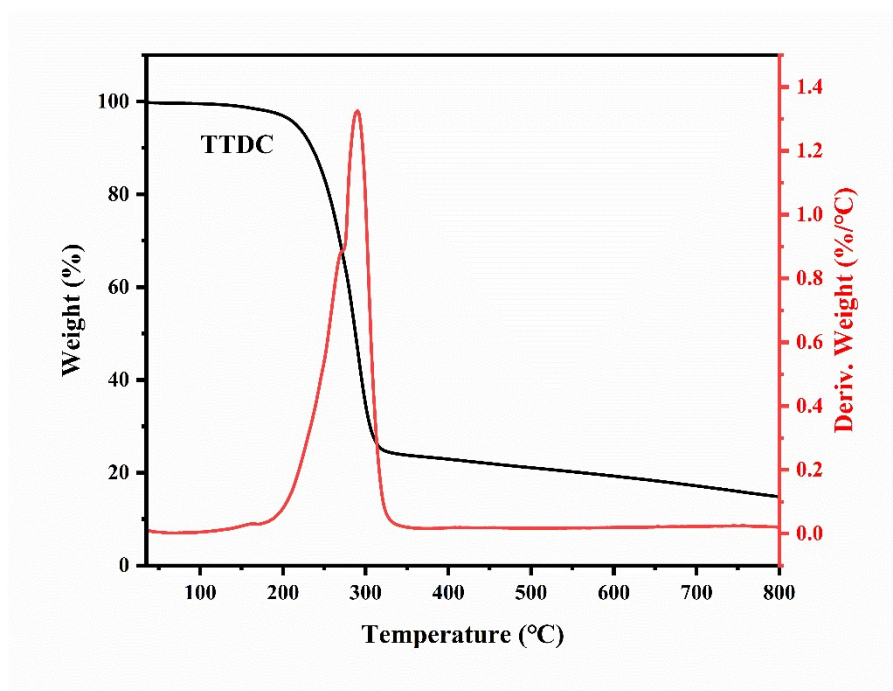

**Fig. S21.** TGA (black) and DTG (red) curves of TTDC under N<sub>2</sub>.

## S2.5 Stability test

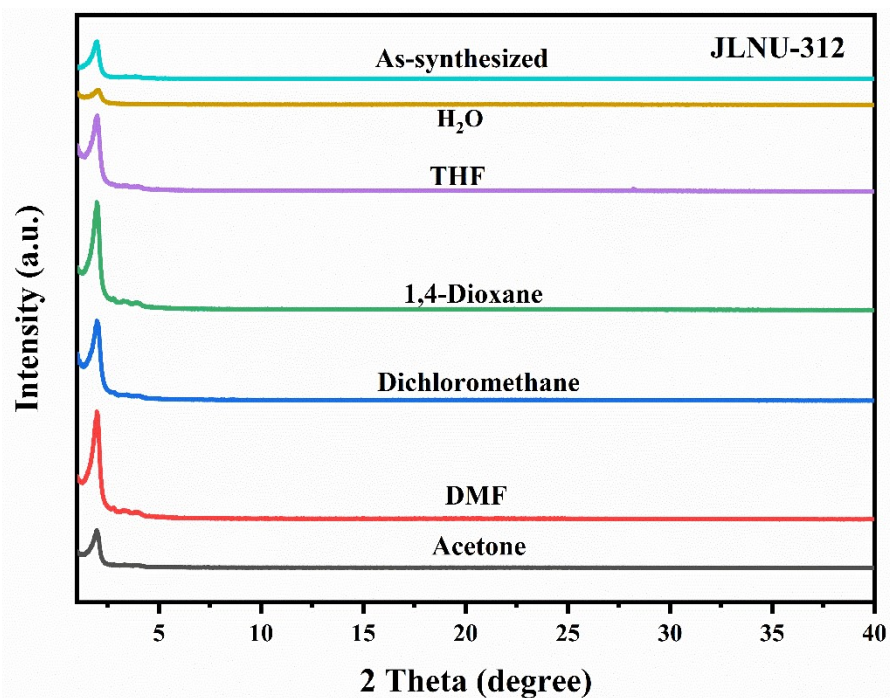

Fig. S22. PXRD patterns of JLNU-312 after 24 hours treatment in different organic solvents.

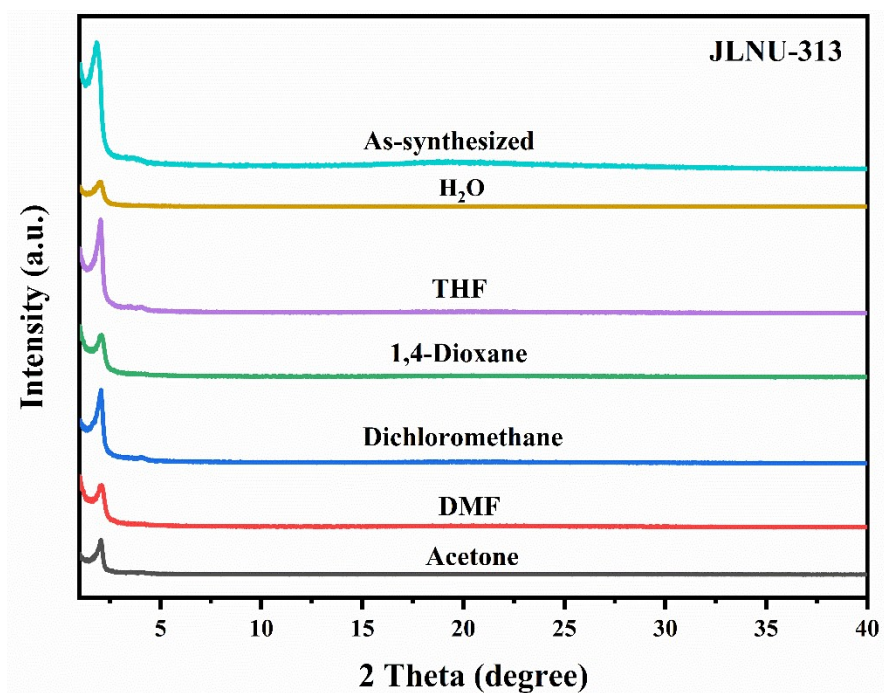

Fig. S23. PXRD patterns of JLNU-313 after 24 hours treatment in different organic solvents.



## S2.6 Iodine uptake and release performance

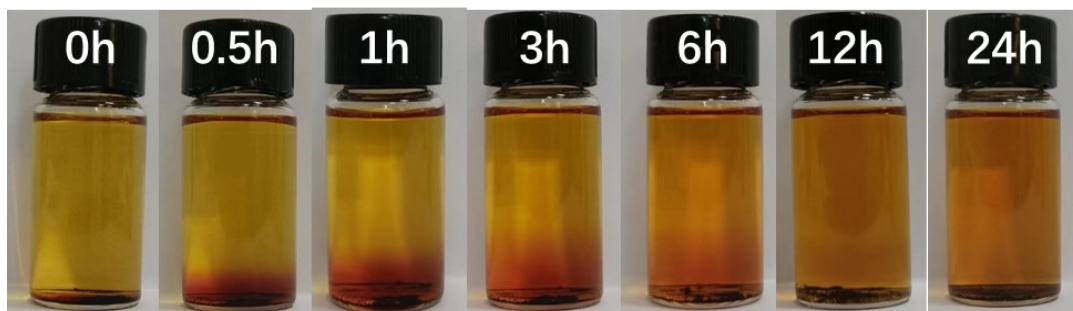

**Figure S24.** The iodine releasing process of  $I_2@JLNU-312$  from ethanol solution.

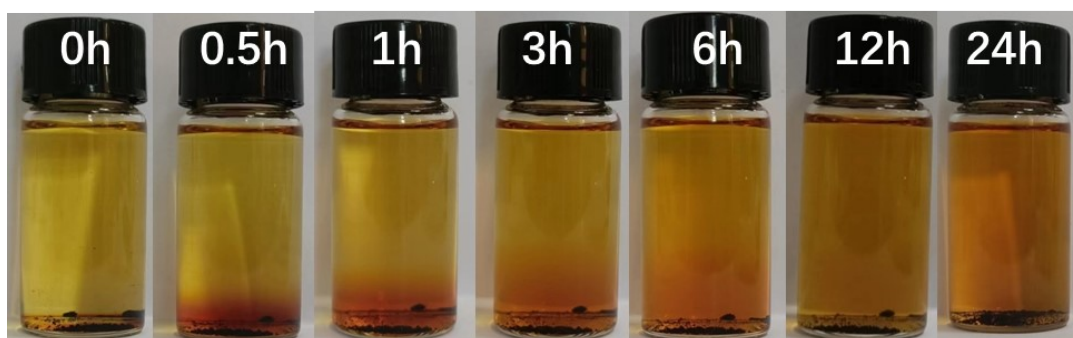

**Figure S25.** The iodine releasing process of  $I_2@JLNU-313$  from ethanol solution.

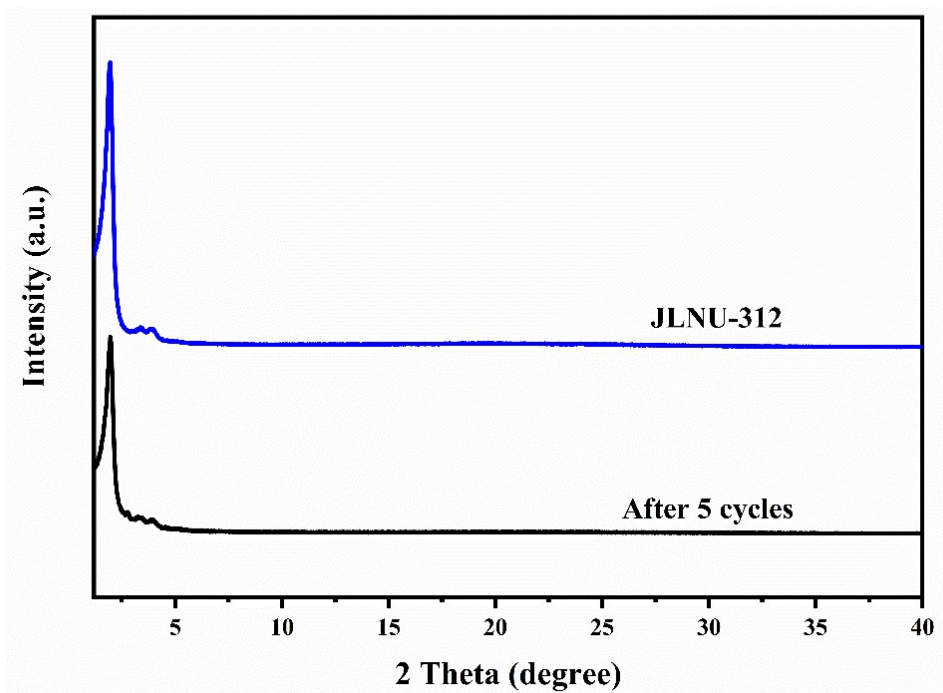

Fig. S26. PXRD of JLNU-312 before and after 5 cycles of iodine uptake.

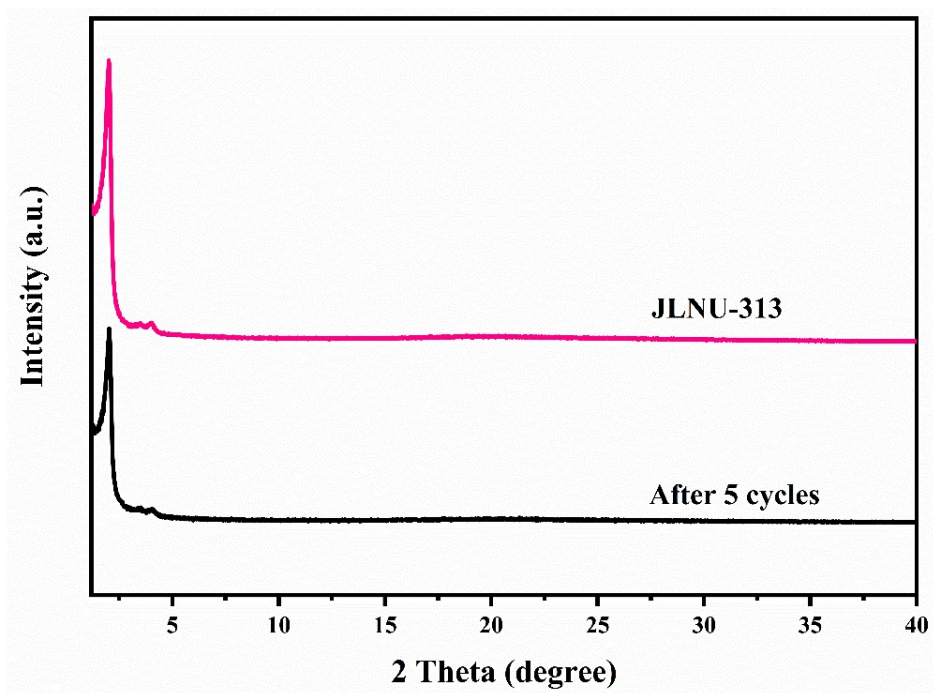

Fig. S27. PXRD of JLNU-313 before and after 5 cycles of iodine uptake.

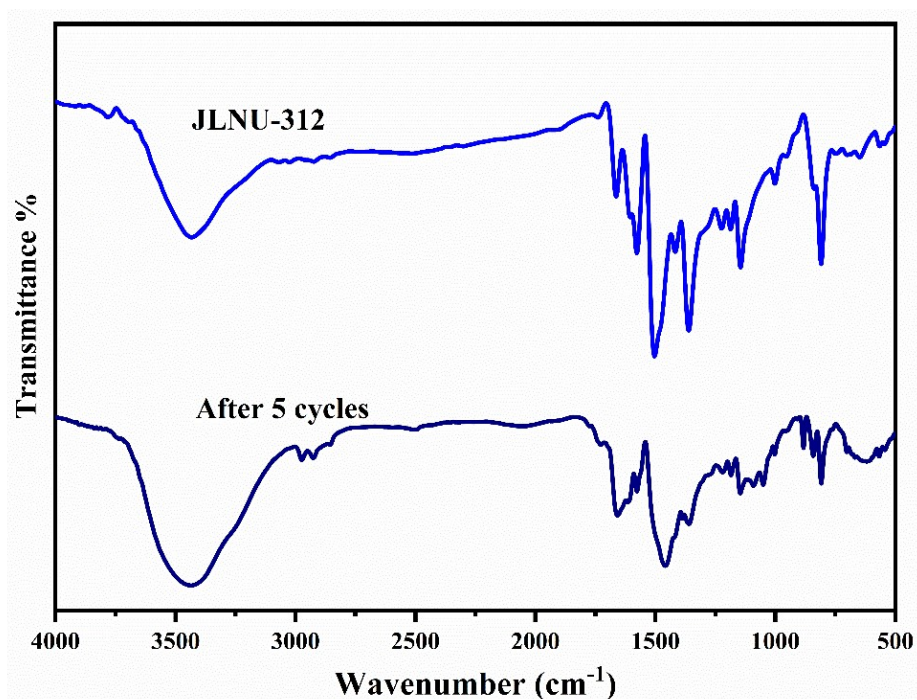

**Fig. S28.** FT-IR of JLNU-312 before and after 5 cycles of iodine uptake.

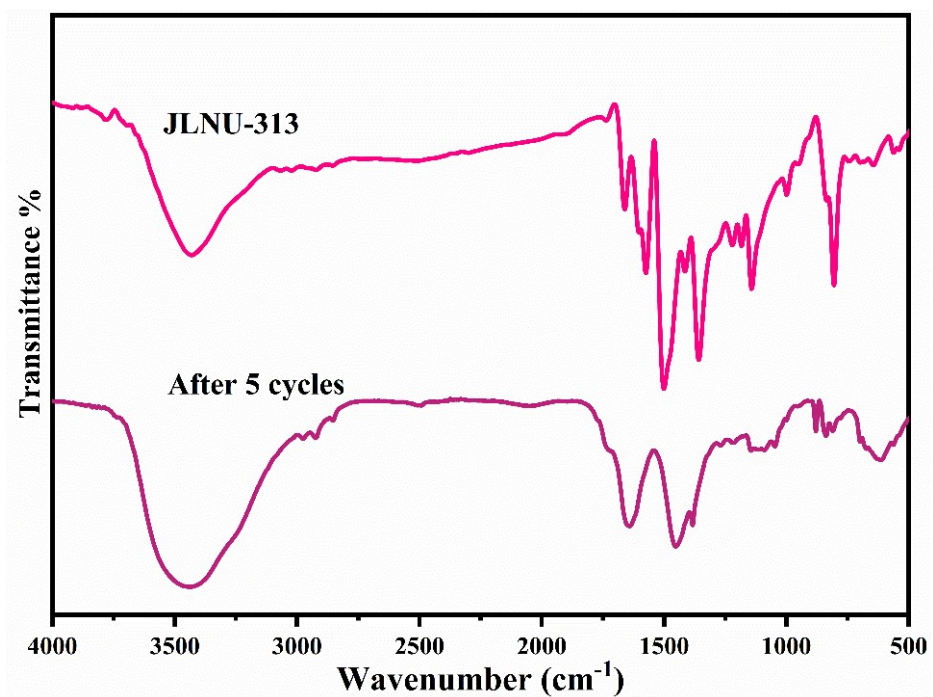

**Fig. S29.** FT-IR of JLNU-313 before and after 5 cycles of iodine uptake.

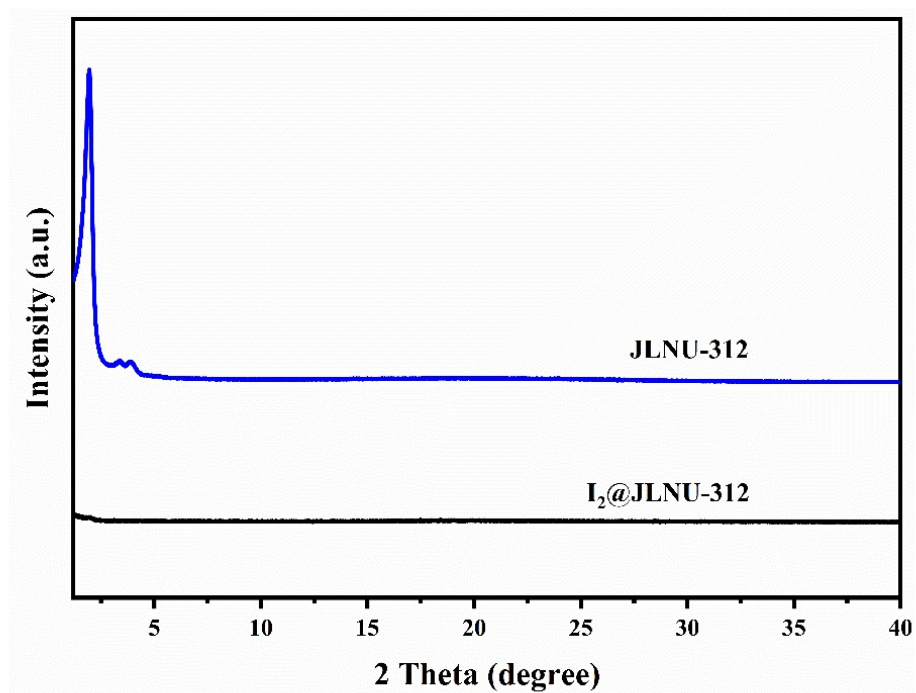

Fig. S30. PXRD patterns of JLNU-312 and I<sub>2</sub>@JLNU-312.

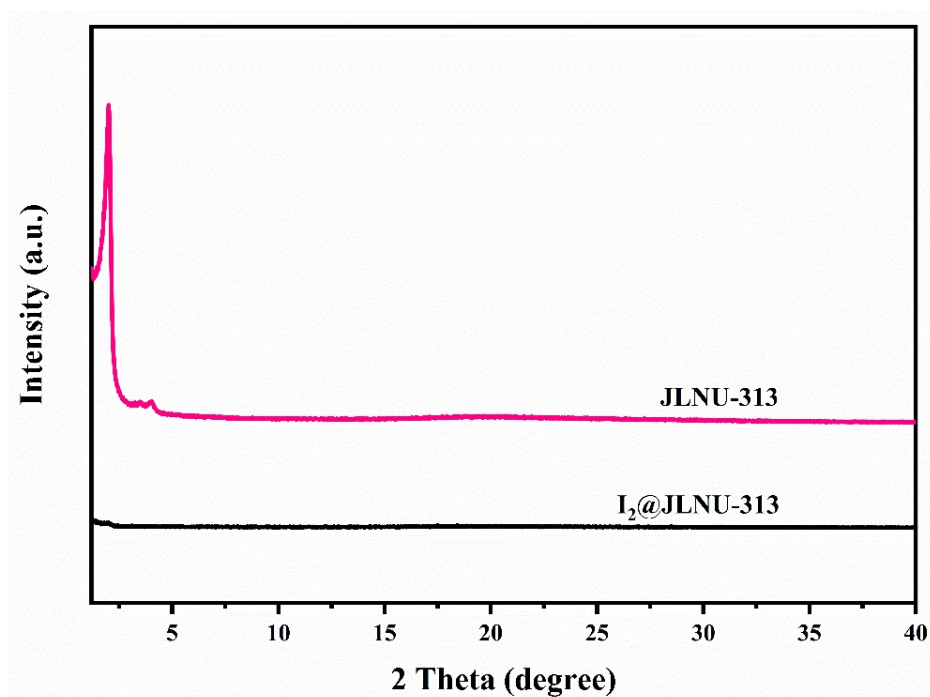

Fig. S31. PXRD patterns of JLNU-313 and I<sub>2</sub>@JLNU-313.

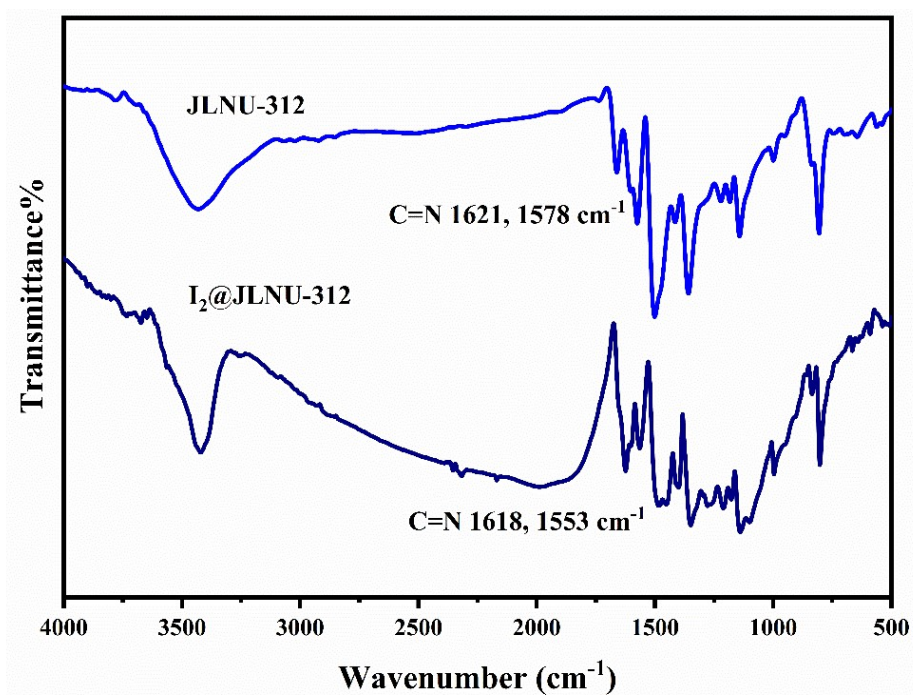

Fig. S32. FT-IR of JLNU-312 and  $\text{I}_2$ @JLNU-312.

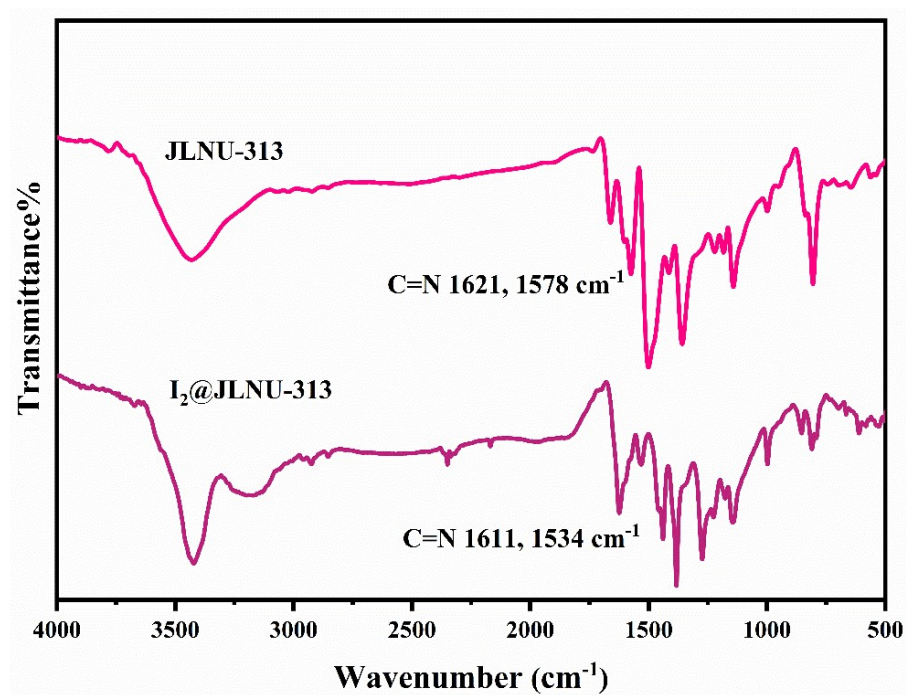

Fig. S33. FT-IR of JLNU-313 and  $\text{I}_2$ @JLNU-313.

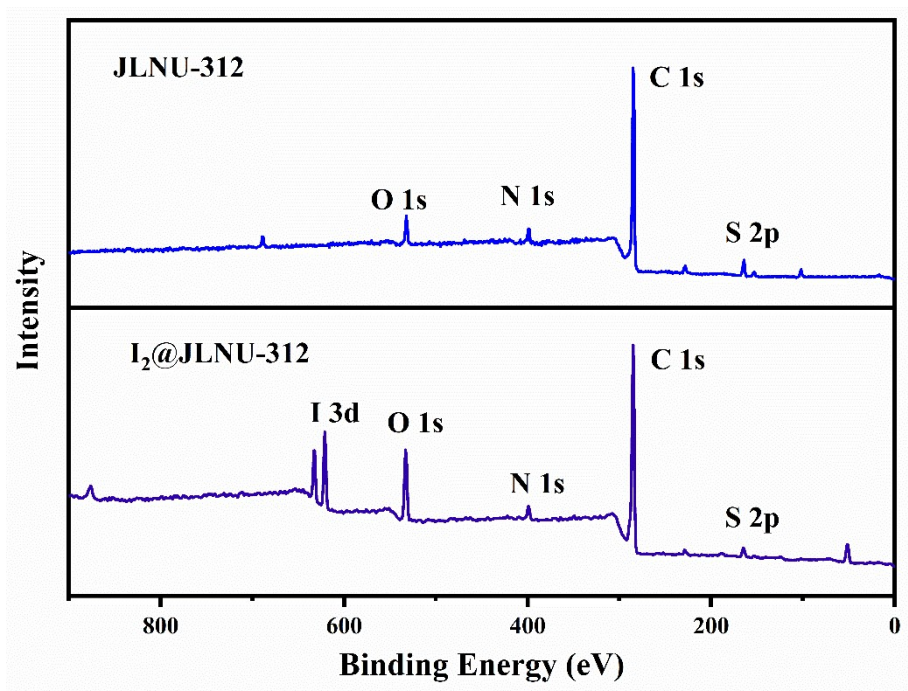

Fig. S34. XPS spectra of JLNU-312 and I<sub>2</sub>@JLNU-312

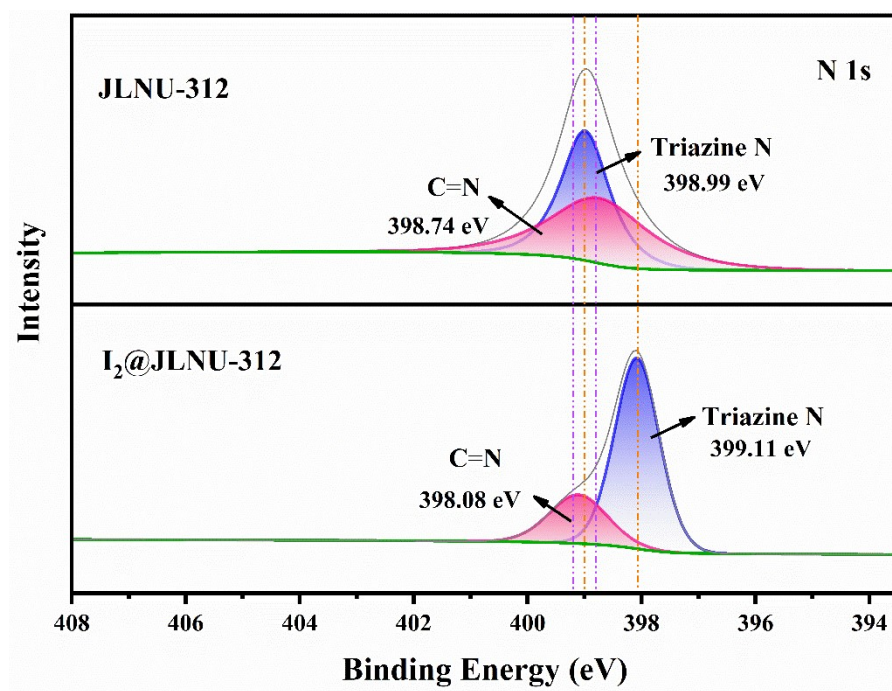

Fig. S35. XPS spectra of N 1s in JLNU-312 and I<sub>2</sub>@JLNU-312.

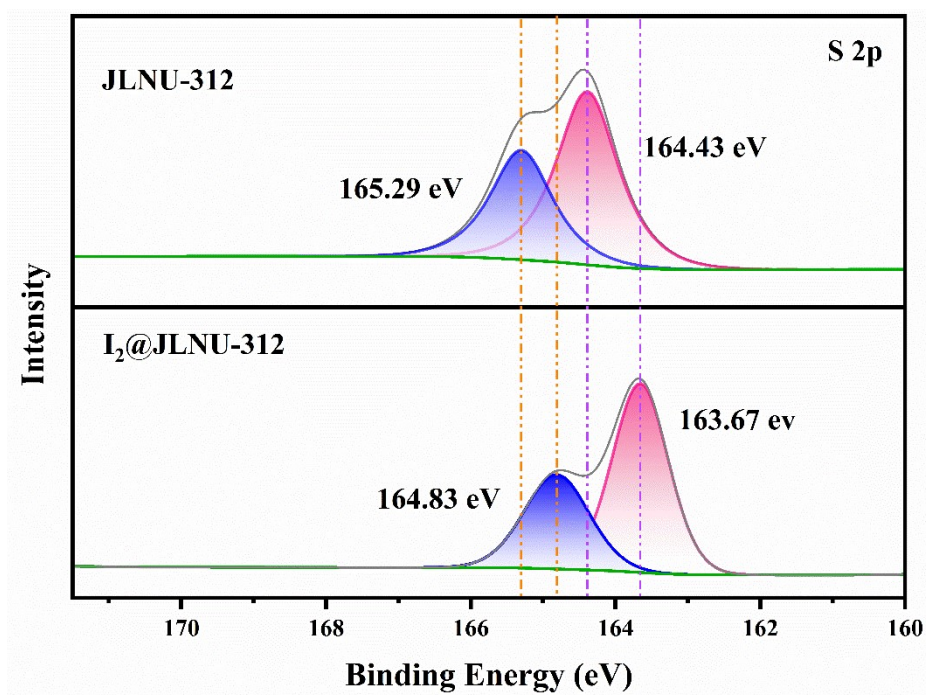

**Fig. S36.** XPS spectra of S 2p in JLNU-312 and I<sub>2</sub>@JLNU-312

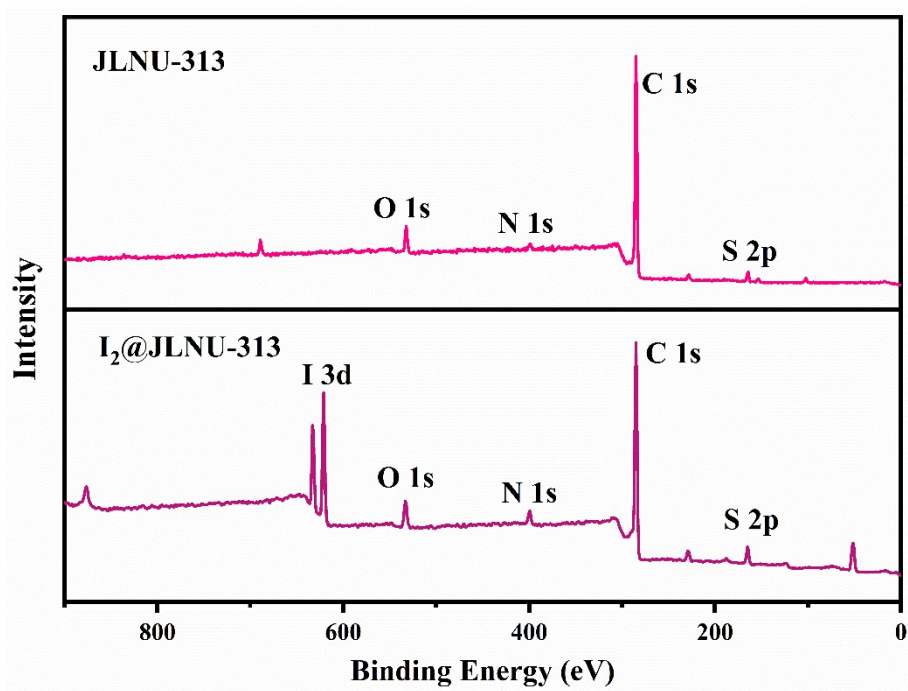

Fig. S37. XPS spectra of JLNU-313 and I<sub>2</sub>@JLNU-313

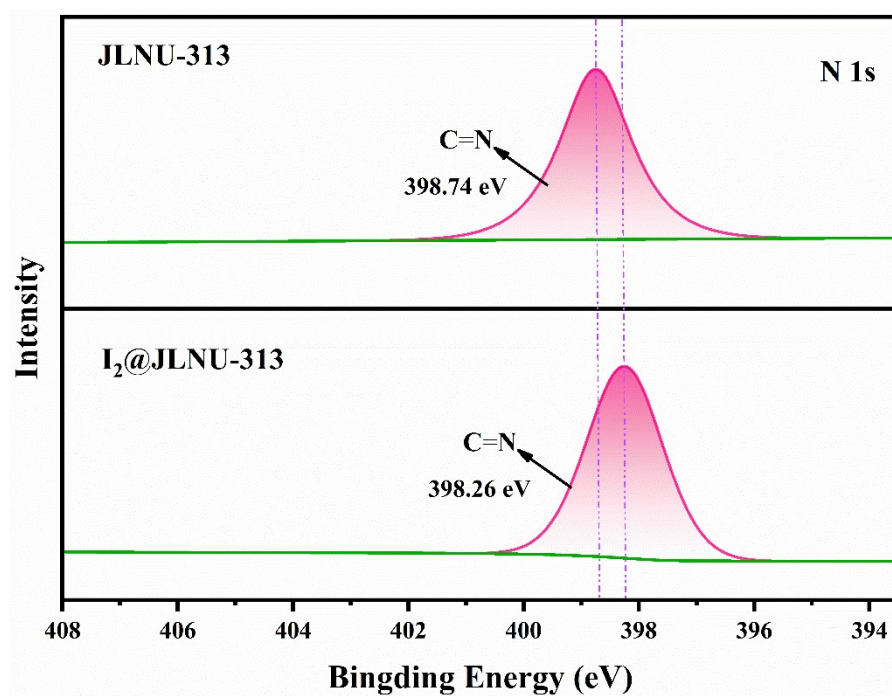

Fig. S38. XPS spectra of N 1s in JLNU-313 and I<sub>2</sub>@JLNU-313.



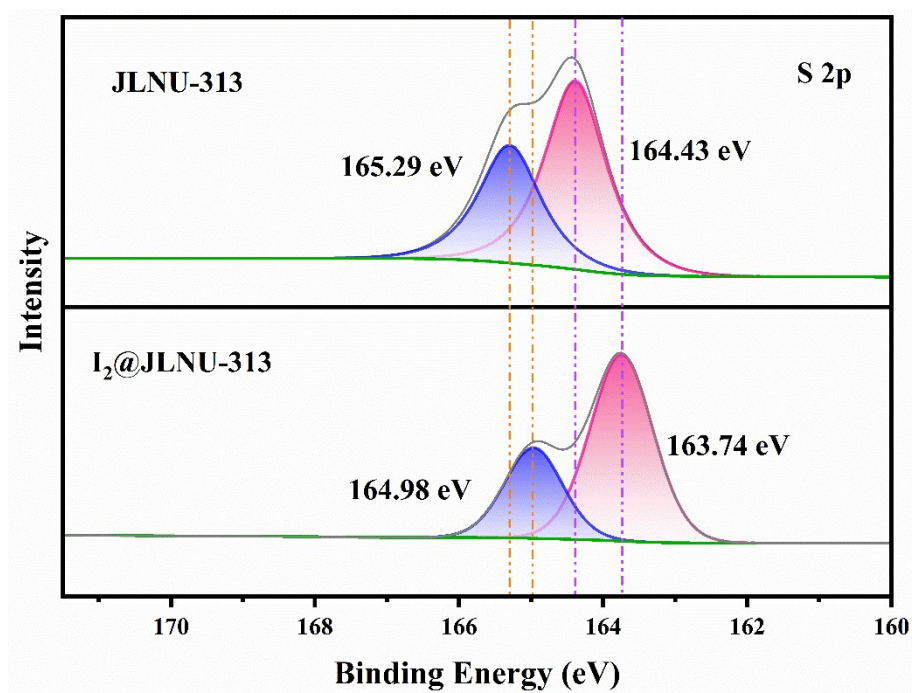

**Fig. S39.** XPS spectra of S 2p in JLNU-313 and I<sub>2</sub>@JLNU-313.

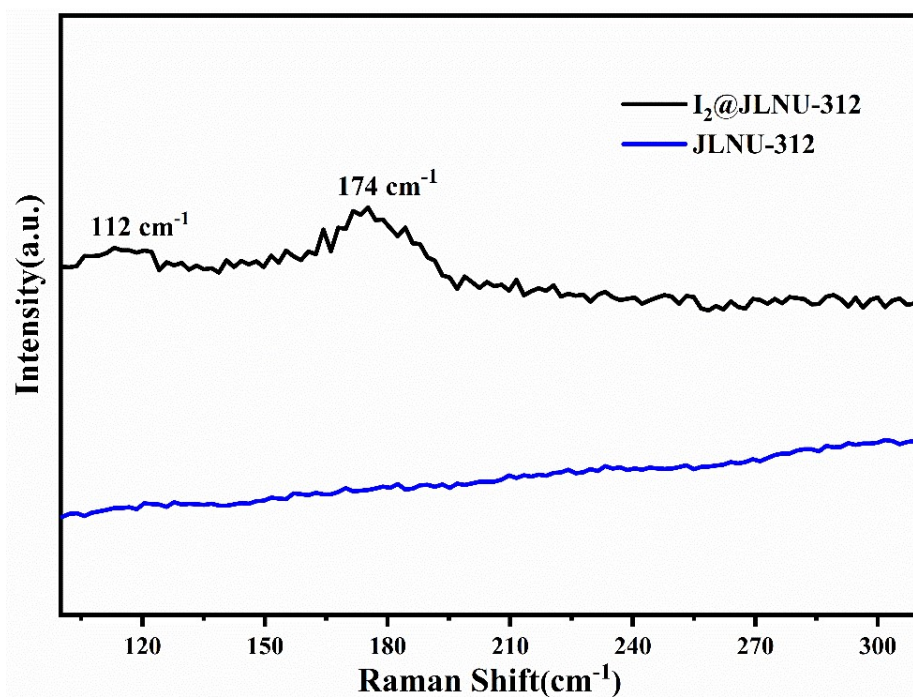

Fig. S40. Raman spectra of JLNU-312 and I<sub>2</sub>@JLNU-312.

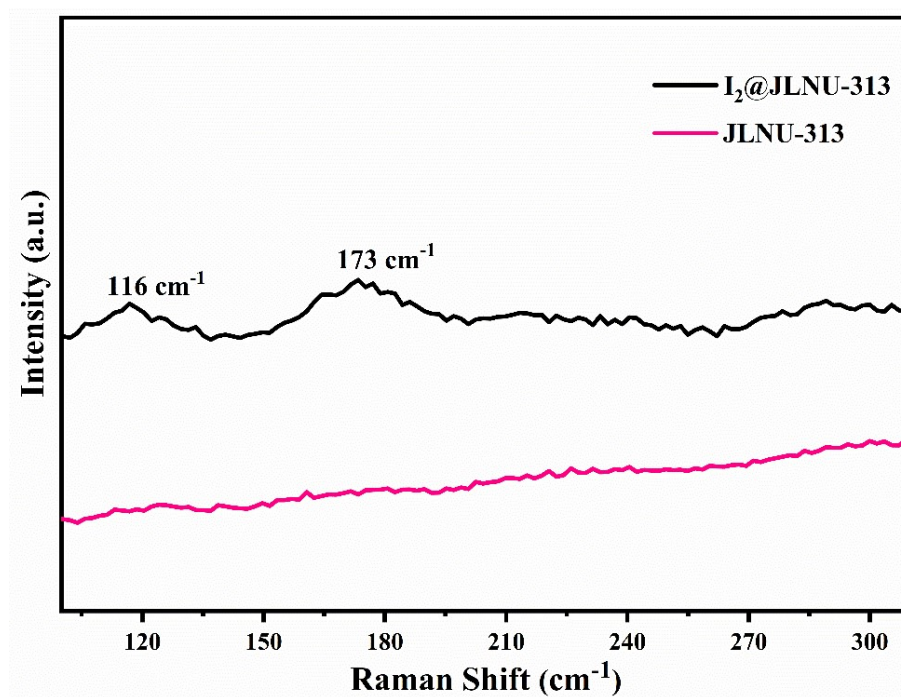

Fig. S41. Raman spectra of JLNU-313 and I<sub>2</sub>@JLNU-313.

### Section S3. Unit cell parameters and fractional atomic coordinates

**Table S1.** Unit cell parameters and fractional atomic coordinates for calculated JLNU-312

|                      |         |                                                                                      |         |
|----------------------|---------|--------------------------------------------------------------------------------------|---------|
| Space group          |         | P6/m (No. 175)                                                                       |         |
| Calculated unit cell |         | a = b = 54.6173 Å, c = 3.5434 Å,<br>$\alpha = \beta = 90^\circ$ $\gamma = 120^\circ$ |         |
| Pawley refinement    |         | $R_{\omega p} = 4.44\%$ and $R_p = 3.41\%$                                           |         |
| Atom                 | x       | y                                                                                    | z       |
| N1                   | 0.01327 | -0.01537                                                                             | 0.01049 |
| C2                   | 0.0288  | 0.01334                                                                              | 0.01049 |
| C3                   | 0.05995 | 0.02777                                                                              | 0.01049 |
| C4                   | 0.07602 | 0.05739                                                                              | 0.01049 |
| C5                   | 0.10555 | 0.07107                                                                              | 0.01049 |
| C6                   | 0.11957 | 0.0554                                                                               | 0.01049 |
| C7                   | 0.10339 | 0.02573                                                                              | 0.01049 |
| C8                   | 0.07386 | 0.01205                                                                              | 0.01049 |
| C9                   | 0.15089 | 0.06991                                                                              | 0.01049 |
| C10                  | 0.16492 | 0.05423                                                                              | 0.01049 |
| C11                  | 0.19446 | 0.0679                                                                               | 0.01049 |
| C12                  | 0.21048 | 0.09743                                                                              | 0.01049 |
| C13                  | 0.19661 | 0.11325                                                                              | 0.01049 |
| C14                  | 0.16708 | 0.09958                                                                              | 0.01049 |
| N15                  | 0.2407  | 0.11079                                                                              | 0.01049 |
| C16                  | 0.288   | 0.15074                                                                              | 0.01049 |
| C17                  | 0.37936 | 0.18294                                                                              | 0.01049 |
| C18                  | 0.45688 | 0.23625                                                                              | 0.01049 |
| C19                  | 0.47075 | 0.22043                                                                              | 0.01049 |

|     |         |         |         |
|-----|---------|---------|---------|
| C20 | 0.50028 | 0.2341  | 0.01049 |
| C21 | 0.51646 | 0.26377 | 0.01049 |
| C22 | 0.50244 | 0.27944 | 0.01049 |
| C23 | 0.4729  | 0.26578 | 0.01049 |
| C24 | 0.54778 | 0.27828 | 0.01049 |
| C25 | 0.5618  | 0.26261 | 0.01049 |
| C26 | 0.59133 | 0.27629 | 0.01049 |
| C27 | 0.60741 | 0.3059  | 0.01049 |
| C28 | 0.5935  | 0.32163 | 0.01049 |
| C29 | 0.56397 | 0.30795 | 0.01049 |
| S30 | 0.30994 | 0.18701 | 0.01049 |
| C31 | 0.33727 | 0.18053 | 0.01049 |
| C32 | 0.33009 | 0.15315 | 0.01049 |
| C33 | 0.30156 | 0.13486 | 0.01049 |
| C34 | 0.3658  | 0.19882 | 0.01049 |
| S35 | 0.35742 | 0.14667 | 0.01049 |
| C36 | 0.25717 | 0.13801 | 0.01049 |
| C37 | 0.41018 | 0.19567 | 1.00779 |
| N38 | 0.42666 | 0.22289 | 1.00779 |
| C39 | 0.63856 | 0.32034 | 0.01049 |
| N40 | 0.65409 | 0.34905 | 0.01049 |

**Table S2.** Unit cell parameters and fractional atomic coordinates for calculated JLNU-313

|                      |         |                                                                                      |         |
|----------------------|---------|--------------------------------------------------------------------------------------|---------|
| Space group          |         | P6/m (No. 175)                                                                       |         |
| Calculated unit cell |         | a = b = 54.1818 Å, c = 6.1385 Å,<br>$\alpha = \beta = 90^\circ$ $\gamma = 120^\circ$ |         |
| Pawley refinement    |         | $R_{wp} = 5.90\%$ and $R_p = 4.21\%$                                                 |         |
| Atom                 | x       | y                                                                                    | z       |
| C1                   | 0.01359 | -0.01573                                                                             | 0.00791 |
| C2                   | 0.02967 | 0.01375                                                                              | 0.00791 |
| C3                   | 0.06082 | 0.02819                                                                              | 0.00791 |
| C4                   | 0.07692 | 0.0577                                                                               | 0.00791 |
| C5                   | 0.10631 | 0.07131                                                                              | 0.00791 |
| C6                   | 0.12026 | 0.05573                                                                              | 0.00791 |
| C7                   | 0.10416 | 0.02622                                                                              | 0.00791 |
| C8                   | 0.07478 | 0.0126                                                                               | 0.00791 |
| C9                   | 0.15143 | 0.07018                                                                              | 0.00791 |
| C10                  | 0.16539 | 0.05458                                                                              | 0.00791 |
| C11                  | 0.19479 | 0.06819                                                                              | 0.00791 |
| C12                  | 0.21073 | 0.09758                                                                              | 0.00791 |
| C13                  | 0.19692 | 0.11332                                                                              | 0.00791 |
| C14                  | 0.16753 | 0.0997                                                                               | 0.00791 |
| N15                  | 0.24081 | 0.11087                                                                              | 0.00791 |
| C16                  | 0.28787 | 0.15064                                                                              | 0.00791 |
| C17                  | 0.37879 | 0.18269                                                                              | 0.00791 |
| N18                  | 0.42586 | 0.22246                                                                              | 0.00791 |
| C19                  | 0.45594 | 0.23576                                                                              | 0.00791 |
| C20                  | 0.46975 | 0.22002                                                                              | 0.00791 |
| C21                  | 0.49913 | 0.23363                                                                              | 0.00791 |
| C22                  | 0.51524 | 0.26316                                                                              | 0.00791 |

|     |         |         |         |
|-----|---------|---------|---------|
| C23 | 0.50128 | 0.27875 | 0.00791 |
| C24 | 0.47188 | 0.26515 | 0.00791 |
| C25 | 0.54641 | 0.2776  | 0.00791 |
| C26 | 0.56036 | 0.26202 | 0.00791 |
| C27 | 0.58975 | 0.27564 | 0.00791 |
| C28 | 0.60584 | 0.30515 | 0.00791 |
| C29 | 0.59189 | 0.32073 | 0.00791 |
| C30 | 0.56251 | 0.30711 | 0.00791 |
| C31 | 0.637   | 0.31958 | 0.00791 |
| C32 | 0.65093 | 0.30401 | 0.00791 |
| S33 | 0.3097  | 0.18674 | 0.00791 |
| C34 | 0.3369  | 0.18029 | 0.00791 |
| C35 | 0.32976 | 0.15305 | 0.00791 |
| C36 | 0.30137 | 0.13484 | 0.00791 |
| C37 | 0.3653  | 0.19849 | 0.00791 |
| S38 | 0.35697 | 0.1466  | 0.00791 |
| C39 | 0.25719 | 0.13796 | 0.00791 |
| C40 | 0.40947 | 0.19537 | 0.00791 |

**Table S3.** Iodine adsorption capacities of different adsorbents.

| <b>Porous Materials</b>     | <b>I<sub>2</sub> uptake(g/g)</b> | <b>Temperature K</b> | <b>Pressure</b> | <b>S<sub>BET</sub> m<sup>2</sup>/g</b> | <b>Cycle number</b> | <b>Ref.</b> |
|-----------------------------|----------------------------------|----------------------|-----------------|----------------------------------------|---------------------|-------------|
| ECUT-COF-13                 | 10.81                            | 75                   | 1 bar           | 425                                    | 10                  | 1           |
| TJNU-201                    | 5.63                             | 77                   | 1 bar           | 2510                                   | 5                   | 2           |
| T-COF-2                     | 4.72                             | 76                   | 1 bar           | 781                                    | 5                   | 3           |
| JLNU-312                    | 4.67                             | 75                   | 1 bar           | 540                                    | 5                   | This work   |
| BTM                         | 4.46                             | 75                   | 1 bar           | /                                      | 4                   | 4           |
| Meso-COF-3                  | 4.0                              | 75                   | 1 bar           | 982                                    | /                   | 5           |
| CTF-CTTD-500                | 3.87                             | 75                   | 1 bar           | 1334                                   | 4                   | 6           |
| POP-2                       | 3.82                             | 80                   | 1 bar           | 41                                     | 5                   | 7           |
| NH <sub>2</sub> -TH-BTA COF | 3.58                             | 75                   | 1 bar           | 10                                     | 6                   | 8           |
| Micro-COF-2                 | 3.5                              | 75                   | 1 bar           | 1056                                   | /                   | 5           |
| Meso-COF-4                  | 3.3                              | 75                   | 1 bar           | 926                                    | /                   | 5           |
| TFBT-1                      | 3.15                             | 75                   | 1 bar           | 451                                    | 3                   | 9           |
| Micro-COF-1                 | 2.9                              | 75                   | 1 bar           | 816                                    | /                   | 5           |
| BDP-CPP-1                   | 2.83                             | 75                   | degassed        | 635                                    | 4                   | 10          |
| TF-TA-COF                   | 2.74                             | 75                   | 1 bar           | 442                                    | 5                   | 11          |
| TFBT-2                      | 2.60                             | 75                   | 1 bar           | 464                                    | 3                   | 9           |
| TTA-DMTP-COF                | 2.59                             | 75                   | 1 bar           | 2333                                   | 5                   | 12          |
| JLNU-313                    | 2.47                             | 75                   | 1 bar           | 280                                    | 5                   | This work   |
| COF-TpgBD                   | 1.81                             | 100                  | 1 bar           | 217                                    | /                   | 13          |

|              |      |    |       |      |   |    |
|--------------|------|----|-------|------|---|----|
| NOP-53       | 1.77 | 75 | 1 bar | 744  | / | 14 |
| ZIF-8        | 1.20 | 75 | 1 bar | 1630 | / | 15 |
| COFs@ cotton | 0.53 | 77 | 1 bar | 124  | 5 | 16 |

## Section S4. References

- [1] Y. W. Huang, Z. W. Yu, Q. Y. Zhang and F. Luo, *Sci. China-Mater.*, 2023, **66**, 2339-2345.
- [2] J. H. Li, H. X. Zhang, L. Y. Zhang, K. Wang, Z. K. Wang, G. Y. Liu, Y. L. Zhao and Y. F. Zeng, *J. Mater. Chem. A*, 2020, **8**, 9523-9527.
- [3] Q. Y. Niu, Q. X. Cui, X. T. Meng, P. Zhang, Y. N. Zhou, H. Fu, B. W. Ma, N. Qin and L. P. Zhai, *New J. Chem.*, 2023, **47**, 7642-7647.
- [4] Y. Zhu, Y. Qi, X. Guo, M. Zhang, Z. Jia, C. Xia, N. Liu, C. Bai, L. Ma and Q. Wang, *J. Mater. Chem. A*, 2021, **9**, 16961-16966.
- [5] S. An, X. Zhu, Y. He, L. Yang, H. Wang, S. Jin, J. Hu and H. Liu, *Ind. Eng. Chem. Res.*, 2019, **58**, 10495-10502.
- [6] Q. Jiang, H. L. Huang, Y. Z. Tang, Y. X. Zhang and C. L. Zhong, *Ind. Eng. Chem. Res.*, 2018, **57**, 15114-15121.
- [7] X. Qian, B. Wang, Z. Q. Zhu, H. X. Sun, F. Ren, P. Mu, C. H. Ma, W. D. Liang and A. Li, *J. Hazard. Mater.*, 2017, **338**, 224-232.
- [8] S. Y. Zhang, X. H. Tang, Y. L. Yan, S. Q. Li, S. R. Zheng, J. Fan, X. L. Li, W. G. Zhang and S. L. Cai, *ACS Macro Lett.*, 2021, **10**, 1590-1596.
- [9] H. Li, D. Zhang, K. Cheng, Z. Li and P.-Z. Li, *ACS Appl. Nano Mater.*, 2023, **6**, 1295-1302.
- [10] Y. L. Zhu, Y. J. Ji, D. G. Wang, Y. Zhang, H. Tang, X. R. Jia, M. Song, G. P. Yu and



- G. C. Kuang, *J. Mater. Chem. A*, 2017, **5**, 6622-6629.
- [11] Y. Li, G. Cui, X. Cai, G. Yun, Y. Zhao, L. Jiang, S. Cui, J. Zhang, M. Liu, W. Zeng, Z. Wang and J. Jiang, *Chem-Eur. J.*, 2024, **30**.
- [12] W. Z. She, Q. L. Wen, H. C. Zhang, J. Z. Liu, R. S. Li, J. Ling and Q. E. Cao, *ACS Appl. Nano Mater.*, 2023, **6**, 18177-18187.
- [13] Y. H. Sun, S. A. Song, D. H. Xiao, L. F. Gan and Y. R. Wang, *ACS Omega*, 2020, **5**, 24262-24271.
- [14] D. Y. Chen, Y. Fu, W. G. Yu, G. P. Yu and C. Y. Pan, *Chem. Eng. J.*, 2018, **334**, 900-906.
- [15] D. F. Sava, T. J. Garino and T. M. Nenoff, *Ind. Eng Chem Res.*, 2012, **51**, 614-620.
- [16] Y. Q. Li, Y. R. Li, Q. H. Zhao, L. Li, R. Chen and C. Y. He, *Cellulose*, 2020, **27**, 1517-1529.
